# Supplementary material
Source: Springer Nature journal article supplement (https://www.springermedizin.de/resource/supplementary/12916_2011_477_MOESM1_ESM.pdf/9599780)
Supplement: MOESM1 [file 9599780]

Precipitating cause or risk factors for ALI

Genetic factors  
Comorbidities

Infection  
VALI  
TRALI  
Fluid overload

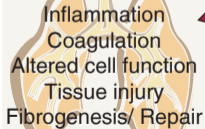

Inflammation  
Coagulation  
Altered cell function  
Tissue injury  
Fibrogenesis/ Repair

The diagram features a central illustration of human lungs with a trachea. A light gray rectangular box is superimposed over the lower portion of the lungs, containing a list of physiological processes. Arrows from the surrounding text boxes point towards this central area.
